# Supplementary material
Source: PubMed Central journal article supplement (PMC2519038)
Supplement: NIHMS62372-supplement-File0011.pdf [file NIHMS62372-supplement-File0011.pdf]

## Supporting Information

### Unusually Strong Binding to the DNA Minor Groove by a Highly Twisted Benzimidazole-Diphenylether: Induced Fit and Bound Water<sup>†</sup>

Fariel A. Taniou<sup>•</sup>, William Laine<sup>‡</sup>, Paul Peixoto<sup>‡</sup>, Christian Bailly<sup>‡, #</sup>,  
Kristie D. Goodwin<sup>§</sup>, Mark A. Lewis<sup>⊥</sup>, Eric C. Long<sup>⊥</sup>, Millie M. Georgiadis<sup>§</sup>,  
Richard R. Tidwell<sup>°</sup>, and W. David Wilson<sup>•,\*</sup>

<sup>•</sup>Department of Chemistry, Georgia State University, P.O. Box 4098, Atlanta, Georgia 30302-4098; <sup>‡</sup>INSERM U-814, <sup>‡</sup>Institute for Cancer Research, Lille 59045, France;  
<sup>§</sup>Department of Biochemistry & Molecular Biology, Indiana University School of Medicine; and <sup>⊥</sup>Department of Chemistry & Chemical Biology, Purdue School of Science, Indiana University-Purdue University Indianapolis (IUPUI), Indianapolis, Indiana 46202; and <sup>°</sup>Department of Pathology, University of North Carolina, Chapel Hill, North Carolina 27599

\* To whom correspondence should be addressed, Tel: 404-651-3903, Fax: 404-651-1416, and Email: [wdw@gsu.edu](mailto:wdw@gsu.edu)

<sup>•</sup>Georgia State University  
<sup>‡</sup>Institute for Cancer Research  
<sup>§</sup>Indiana University School of Medicine, IUPUI  
<sup>⊥</sup>Purdue School of Science, IUPUI  
<sup>°</sup>University of North Carolina

<sup>#</sup>present address: Institut de Recherche Pierre Fabre, 3 rue des satellites, 31400 Toulouse, France

**Figure S1.** SPR sensorgrams for the kinetics interaction of RT29 with AATTAA hairpin DNA. The RT29 concentrations are from the lowest curve to highest curve 0,  $1 \times 10^{-9}$ ,  $2.5 \times 10^{-9}$ ,  $3.5 \times 10^{-9}$ ,  $5.5 \times 10^{-9}$ ,  $2.5 \times 10^{-8}$ ,  $5 \times 10^{-8}$ ,  $7.5 \times 10^{-8}$ , and  $1.0 \times 10^{-7}$  M. The experiments were conducted at  $25^{\circ}\text{C}$  in 10 mM Tris buffer, 1 mM EDTA, 1 M NaCl, pH 7.4 at a flow rate of  $50 \mu\text{L}/\text{min}$ .

**Figure S2.** ITC titration of RT29 into AATTAA hairpin DNA. The experiment were conducted in a Microcal VP ITC at  $25^{\circ}\text{C}$  in 10mM cacodylic buffer, 1mM EDTA, 200mM NaCl and pH 6.25. The experiments were conducted by injecting an initial 4  $\mu\text{l}$  aliquot of the RT29 compound (35  $\mu\text{M}$ ) into DNA solution (10  $\mu\text{M}$  in strand) in order to prime the syringe. This was followed by injection of a series of 10  $\mu\text{l}$  aliquots of compound into DNA solution every 300 s.

**Figure S3.** Isothermal calorimetric titration curve of RT29 of 0.100mM into 0.0075mM 5'-CGATTCCGTTCTCCGAATCG-3' sequence hairpin duplex in (CAC20 buffer with 200mM NaCl) at  $25^{\circ}\text{C}$ . The corrected heat was fitted to obtain  $\Delta\text{H}$ .

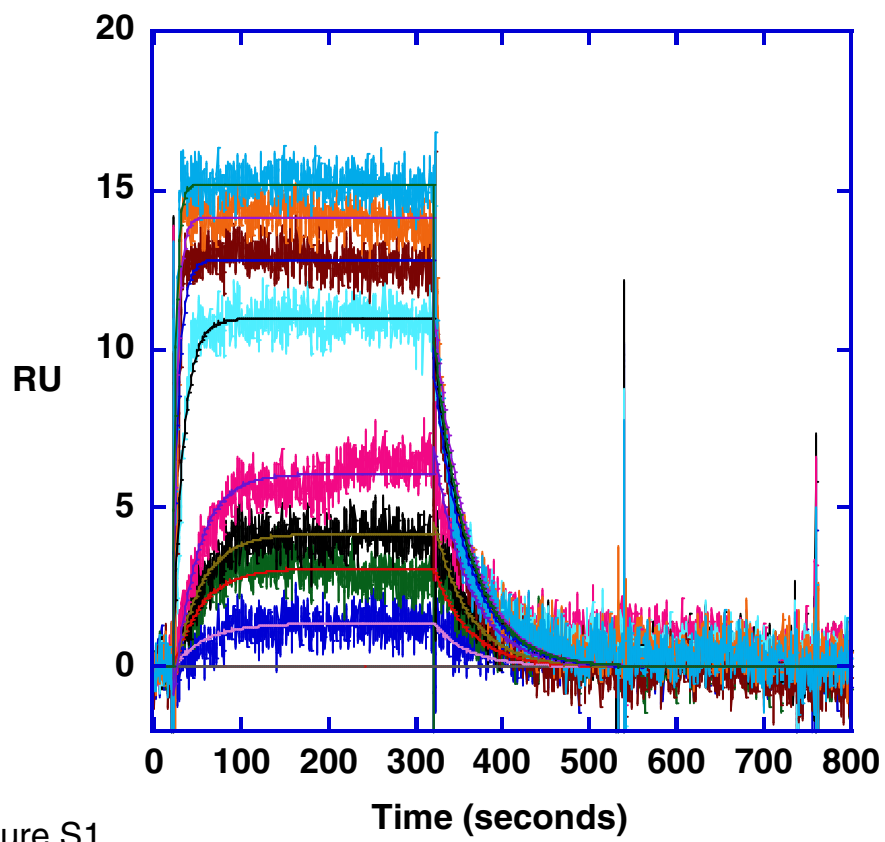

Figure S1

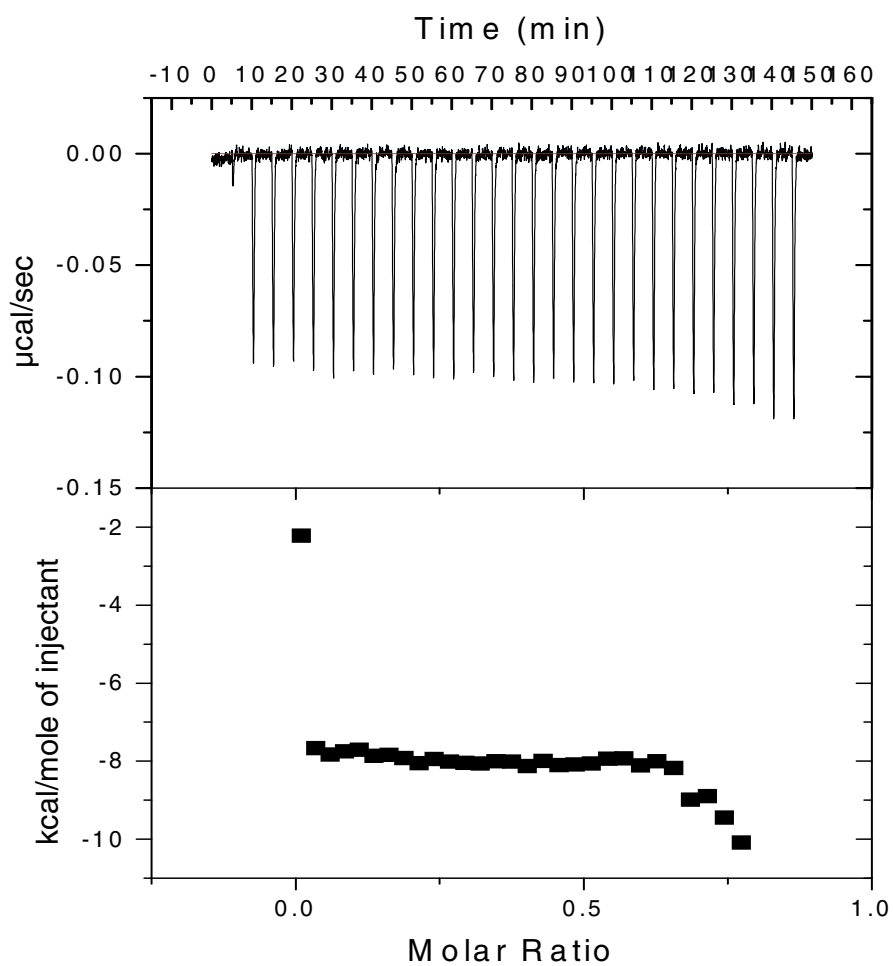

Figure S2

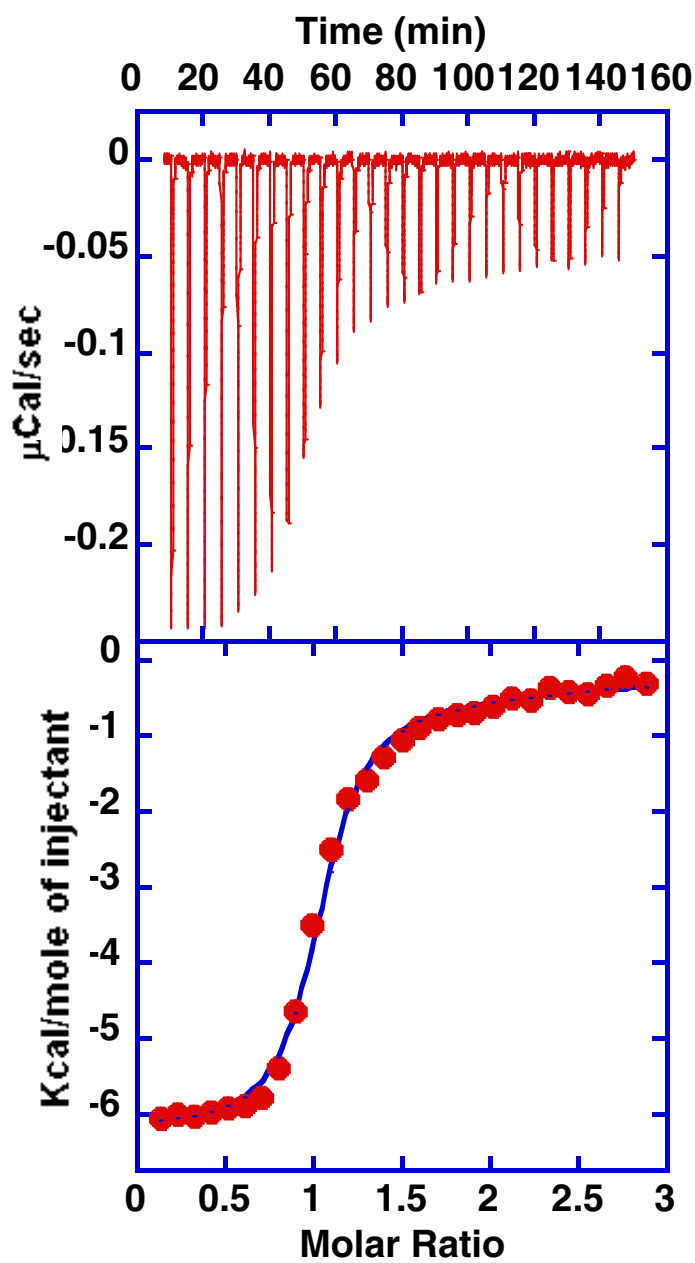

Figure S3
